# Supplementary material for: Cholesterol transfer via endoplasmic reticulum contacts mediates lysosome damage repair
Source: PubMed Central journal article supplement — EMBO J. 2022 Nov 21;41(24):e112677. doi: 10.15252/embj.2022112677 (PMC9753466; doi:10.15252/embj.2022112677), 2022-11-21
Supplement: EMBJ-41-e112677-s007.pdf [file EMBJ-41-e112677-s007.pdf]

# Cholesterol transfer via endoplasmic reticulum contacts mediates lysosome damage repair

Maja Radulovic, Eva Wenzel, Sania Gilani, Lya Katrine Holland, Alf Håkon Lystad, Santosh Phuyal, Vesa Olkkonen, Andreas Brech, Marja Jäättelä, Kenji Maeda, Camilla Raiborg, and Harald Stenmark

**DOI: 10.15252/embj.2022112677**

*Corresponding author(s): Harald Stenmark (h.a.stenmark@medisin.uio.no) , Maja Radulovic (maja.radulovic@ous-research.no)*

---

## Review Timeline:

|                     |             |
|---------------------|-------------|
| Submission Date:    | 25th Sep 22 |
| Editorial Decision: | 4th Oct 22  |
| Revision Received:  | 1st Nov 22  |
| Editorial Decision: | 4th Nov 22  |
| Revision Received:  | 5th Nov 22  |
| Accepted:           | 7th Nov 22  |

---

*Editor: William Teale*

## Transaction Report:

(Note: With the exception of the correction of typographical or spelling errors that could be a source of ambiguity, letters and reports are not edited. Depending on transfer agreements, referee reports obtained elsewhere may or may not be included in this compilation. Referee reports are anonymous unless the Referee chooses to sign their reports.)

Dear Harald,

I now have received an adjudicating review which judges that your manuscript is indeed, in principle, suitable for publication in EMBO Journal.

Given the positive recommendation, I would like to invite you to submit a revised version of the manuscript, addressing the comments of the reviewer. I am sending you the review back straight away so you can start work on the revisions as soon as possible. I will simultaneously run all editorial checks from our side and let you know as soon as I have these internal reports.

Please bear in mind that all correspondence will form part of the Review Process File, and will therefore be available online to the community. For more details on our Transparent Editorial Process, please visit our website:  
<https://www.embopress.org/page/journal/14602075/authorguide#transparentprocess>

Thank you for the opportunity to consider your work for publication. I look forward to your revision.

Yours sincerely,

William Teale, PhD  
Editor  
The EMBO Journal  
[w.teale@embojournal.org](mailto:w.teale@embojournal.org)

Instructions for preparing your revised manuscript:

Please check that the title and abstract of the manuscript are brief, yet explicit, even to non-specialists.

When assembling figures, please refer to our figure preparation guideline in order to ensure proper formatting and readability in print as well as on screen:

<https://bit.ly/EMBOPressFigurePreparationGuideline>

See also figure legend guidelines: <https://www.embopress.org/page/journal/14602075/authorguide#figureformat>

**IMPORTANT:** When you send the revision we will require

- a point-by-point response to the referees' comments, with a detailed description of the changes made (as a word file).
- a word file of the manuscript text.
- individual production quality figure files (one file per figure)
- a complete author checklist, which you can download from our author guidelines (<https://www.embopress.org/page/journal/14602075/authorguide>).
- Expanded View files (replacing Supplementary Information)

Please see out instructions to authors

<https://www.embopress.org/page/journal/14602075/authorguide#expandedview>

Please remember: Digital image enhancement is acceptable practice, as long as it accurately represents the original data and conforms to community standards. If a figure has been subjected to significant electronic manipulation, this must be noted in the figure legend or in the 'Materials and Methods' section. The editors reserve the right to request original versions of figures and the original images that were used to assemble the figure.

Further information is available in our Guide For Authors: <https://www.embopress.org/page/journal/14602075/authorguide>

We realize that it is difficult to revise to a specific deadline. In the interest of protecting the conceptual advance provided by the work, we recommend a revision within 3 months (2nd Jan 2023). Please discuss the revision progress ahead of this time with the editor if you require more time to complete the revisions. Use the link below to submit your revision:

<https://emboj.msubmit.net/cgi-bin/main.plex>

-----

Referee #1:

Radulovic et al studied a new mechanism by which lysosomal membrane damage is repaired in ESCRT-independent manner by the formation of contacts between the ER and the lysosome that deliver cholesterol. According to the suggested model, the VAPA/B, an ER protein previously implicated in plasma membrane ER contacts, is needed for the formation of ER-lysosome contacts formed in response to lysosomal membrane damage. ORP1L, a cholesterol-binding protein is recruited to the membrane damage site by interacting with VAPA/B followed by accumulation of cholesterol in the lysosomal membrane. The authors also found that the PtdIns 4-kinase (PI4K2A) rapidly produce PtdIns4P on the damaged lysosomal membrane, serving to recruit ORP1L and cholesterol. The authors report that OSBP, a cholesterol-PtdIns4 transporter is also recruited to the damaged lysosomal membrane and in its absence the membrane repair is inhibited leading to cell death.

Overall, this is an interesting study that provide mechanistic details to the new lysosomal membrane repair process described last month by Tan and Finkel. The authors show a detailed lipid analysis of isolated control and damaged lysosomes. They show that ORP1L-mediated cholesterol transfer is essential to the repair process and showed that its recruitment to the damaged lysosomal membrane is regulated by PI4K2A and the accumulation of PtdIns4P on these membranes. In addition, the authors present data supporting the hypothesis that similar to its role in ER-Golgi contacts, OSBP may act to transfer cholesterol from the ER to the damaged lysosomal membrane in exchange to PtdIns4P.

There are few minor issues that require the authors' attention:

1. The data presented in Fig.2, showing the contacts between the ER and the damaged lysosomes is very exciting. The authors also tested for the effect of VAP knockout and claim that it prevents such contacts (Fig. EV4). It is important that this data should be quantified (similarly to that shown in Fig. 2B) and presented as part of Fig. 2. It would also be important to verify the presence of VAP proteins in the contacts shown in figure 2.
2. The authors should challenge their model by looking for VAP proteins in their purified lysosomes obtained from cells lacking (knockdown or knockout) either PI4K2A, ORP1L and or OSBP. Alternatively, biochemical approaches should be utilized to show interaction between VAPA/B and ORP1L or OSBP.
3. In the survival assay shown in Fig. 8C the authors describe LLOMe treatments of 0-180 min. It would be more suitable to test longer treatment periods.
4. Finally, and most importantly, the authors should better describe in the Discussion section the similarities and the differences between their and Tan and Finkel reports.

## EMBOJ-2022-112677, response to reviewer's comments

Reviewer comments in black font, response in blue.

Radulovic et al studied a new mechanism by which lysosomal membrane damage is repaired in ESCRT-independent manner by the formation of contacts between the ER and the lysosome that deliver cholesterol. According to the suggested model, the VAPA/B, an ER protein previously implicated in plasma membrane ER contacts, is needed for the formation of ER-lysosome contacts formed in response to lysosomal membrane damage. ORP1L, a cholesterol-binding protein is recruited to the membrane damage site by interacting with VAPA/B followed by accumulation of cholesterol in the lysosomal membrane. The authors also found that the PtdIns 4-kinase (PI4K2A) rapidly produce PtdIns4P on the damaged lysosomal membrane, serving to recruit ORP1L and cholesterol. The authors report that OSBP, a cholesterol-PtdIns4 transporter is also recruited to the damaged lysosomal membrane and in its absence the membrane repair is inhibited leading to cell death.

Overall, this is an interesting study that provide mechanistic details to the new lysosomal membrane repair process described last month by Tan and Finkel. The authors show a detailed lipid analysis of isolated control and damaged lysosomes. They show that ORP1L-mediated cholesterol transfer is essential to the repair process and showed that its recruitment to the damaged lysosomal membrane is regulated by PI4K2A and the accumulation of PtdIns4P on these membranes. In addition, the authors present data supporting the hypothesis that similar to its role in ER-Golgi contacts, OSBP may act to transfer cholesterol from the ER to the damaged lysosomal membrane in exchange to PtdIns4P.

There are few minor issues that require the authors' attention:

1. The data presented in Fig.2, showing the contacts between the ER and the damaged lysosomes is very exciting. The authors also tested for the effect of VAP knockout and claim that it prevents such contacts (Fig. EV4). It is important that this data should be quantified (similarly to that shown in Fig. 2B) and presented as part of Fig. 2. It would also be important to verify the presence of VAP proteins in the contacts shown in figure 2.

We thank the reviewer for the excellent comments, and we have now quantified the EM data for the VAP double knockout cells as suggested. Indeed, the quantifications confirmed that there is no increase in ER-lysosome contact sites in VAP double knockout cells. Because of the importance of this result, we moved the complete VAP data set to a revised Figure 2C.

Regarding the presence of VAP proteins at the ER-Lysosome contacts, we performed immunofluorescence microscopy and detected co-occurrence between LAMP1 and VAPA positive lysosomes after 10 min of LLOMe treatment:

Ideally, we would have liked to confirm this result by immunoelectron microscopy, but the lack of antibodies suited for immunoelectron microscopy precluded this.

2. The authors should challenge their model by looking for VAP proteins in their purified lysosomes obtained from cells lacking (knockdown or knockout) either PI4K2A, ORP1L and or OSBP. Alternatively, biochemical approaches should be utilized to show interaction between VAPA/B and ORP1L or OSBP.

We tested the purity of immunoprecipitated lysosomes by excluding contamination from the ER membranes (as probed by Calnexin shown in Fig EV1). Since VAP proteins are ER-resident, we did not look for them in the purified lysosomal fractions. In our model, we assume that lysosomes are in contact with the ER membrane and that this contact is mediated by VAP proteins among others. However, we have performed the suggested co-IP experiment with GFP-ORP1L and GFP-OSBP (see figure for reviewer, below).. In agreement with previous publications, we detected interactions of VAPB with both ORP1L and OSBP. Because interactions between VAP proteins and ORP1L and OSBP have been demonstrated in multiple papers previously, we suggest not to include this figure in our manuscript.

3. In the survival assay shown in Fig. 8C the authors describe LLOMe treatments of 0-180 min. It would be more suitable to test longer treatment periods.

We thank the reviewer for this suggestion, but we refrained from performing longer time points since cell viability was already quite impaired in OSBP depleted cells after 3 h of LLOMe treatment. However, we did strengthen our current 3h dataset by performing more experiments to reach higher cell numbers for the quantification.

4. Finally, and most importantly, the authors should better describe in the Discussion section the similarities and the differences between their and Tan and Finkel reports.

As suggested, in the revised manuscript we have better described similarities and differences between our and Tan & Finkel's studies (second paragraph of the Discussion). Overall, the two papers complement each other well and jointly show the importance of PI4K2A and ER-lysosome contacts in lysosome repair. Differences partially exist in use of methodology (proximity biotinylation and in vitro assays in the Finkel paper, vs lipidomics and electron microscopy in our manuscript), and also in the fact that the Finkel paper focuses on phospholipid transfer whereas our paper focuses on cholesterol transfer. Finally, the Finkel paper identified a potential role for  $Ca^{2+}$  in PI4K2A recruitment whereas our manuscript shows a role for OSBP in removal of PtdIns4P on lysosomes and demonstrates its importance for viability.

Dear Harald,

Thank you for submitting a revised version of your manuscript. There are now only a couple of minor revisions to be made. Would you please:

- Format the manuscript as a .doc file with no figures and no track changes
- Change the Conflict of interest section title to "DISCLOSURE AND COMPETING INTERESTS STATEMENT"
- Remove the author contributions section from the manuscript and add names on the AC/CRedit section of our submission website.
- Consider adding Source Data files containing the original photographs of the few western blots shown in the manuscript, and
- Add a synopsis image and text. The image could be taken from the manuscript, and the text need only be two sentences and three or four bullet points.

Best wishes,

William

William Teale, PhD  
Editor  
The EMBO Journal  
w.teale@embojournal.org

Use the link below to submit your revision:

<https://emboj.msubmit.net/cgi-bin/main.plex>

-----

All editorial and formatting issues were resolved by the authors.



Dear Harald, dear Maja,

I am pleased to inform you that your manuscript has been accepted for publication in the EMBO Journal.

Thank you for choosing EMBO Journal for this really impressive manuscript!

-----

Please note that it is EMBO Journal policy for the transcript of the editorial process (containing referee reports and your response letter) to be published as an online supplement to each paper. If you do NOT want this, you will need to inform the Editorial Office via email immediately. More information is available here:  
<https://www.embopress.org/page/journal/14602075/authorguide#transparentprocess>

Your manuscript will be processed for publication in the journal by EMBO Press. Manuscripts in the PDF and electronic editions of The EMBO Journal will be copy edited, and you will be provided with page proofs prior to publication. Please note that supplementary information is not included in the proofs.

You will be contacted by Wiley Author Services to complete licensing and payment information. The required 'Page Charges Authorization Form' is available here: [https://www.embopress.org/pb-assets/embo-site/tej\\_apc.pdf](https://www.embopress.org/pb-assets/embo-site/tej_apc.pdf) - please download and complete the form and return to [embopressproduction@wiley.com](mailto:embopressproduction@wiley.com)

EMBO Press participates in many Publish and Read agreements that allow authors to publish Open Access with reduced/no publication charges. Check your eligibility: <https://authorservices.wiley.com/author-resources/Journal-Authors/open-access/affiliation-policies-payments/index.html>

Should you be planning a Press Release on your article, please get in contact with [embojournal@wiley.com](mailto:embojournal@wiley.com) as early as possible, in order to coordinate publication and release dates.

If you have any questions, please do not hesitate to call or email the Editorial Office. Thank you for your contribution to The EMBO Journal.

Best wishes,

William

William Teale, PhD  
Editor  
The EMBO Journal  
[w.teale@embojournal.org](mailto:w.teale@embojournal.org)

\*\* Click here to be directed to your login page: <https://emboj.msubmit.net>

## EMBO Press Author Checklist

|                                            |
|--------------------------------------------|
| Corresponding Author Name: Harald Stenmark |
| Journal Submitted to: EMBO J               |
| Manuscript Number: EMBOJ-2022-112677       |

### USEFUL LINKS FOR COMPLETING THIS FORM

- [The EMBO Journal - Author Guidelines](#)
- [EMBO Reports - Author Guidelines](#)
- [Molecular Systems Biology - Author Guidelines](#)
- [EMBO Molecular Medicine - Author Guidelines](#)

### Reporting Checklist for Life Science Articles (updated January)

This checklist is adapted from Materials Design Analysis Reporting (MDAR) Checklist for Authors. MDAR establishes a minimum set of requirements in transparent reporting in the life sciences (see Statement of Task: [10.31222/osf.io/9sm4x](https://doi.org/10.31222/osf.io/9sm4x)). Please follow the journal's guidelines in preparing your manuscript.

**Please note that a copy of this checklist will be published alongside your article.**

### Abridged guidelines for figures

#### 1. Data

The data shown in figures should satisfy the following conditions:

- the data were obtained and processed according to the field's best practice and are presented to reflect the results of the experiments in an accurate and unbiased manner.
- ideally, figure panels should include only measurements that are directly comparable to each other and obtained with the same assay.
- plots include clearly labeled error bars for independent experiments and sample sizes. Unless justified, error bars should not be shown for technical replicates.
- if  $n < 5$ , the individual data points from each experiment should be plotted. Any statistical test employed should be justified.
- Source Data should be included to report the data underlying figures according to the guidelines set out in the authorship guidelines on Data

#### 2. Captions

Each figure caption should contain the following information, for each panel where they are relevant:

- a specification of the experimental system investigated (eg cell line, species name).
- the assay(s) and method(s) used to carry out the reported observations and measurements.
- an explicit mention of the biological and chemical entity(ies) that are being measured.
- an explicit mention of the biological and chemical entity(ies) that are altered/varied/perturbed in a controlled manner.
- the exact sample size (n) for each experimental group/condition, given as a number, not a range;
- a description of the sample collection allowing the reader to understand whether the samples represent technical or biological replicates (including how many animals, litters, cultures, etc.).
- a statement of how many times the experiment shown was independently replicated in the laboratory.
- definitions of statistical methods and measures:
  - common tests, such as t-test (please specify whether paired vs. unpaired), simple  $\chi^2$  tests, Wilcoxon and Mann-Whitney tests, can be unambiguously identified by name only, but more complex techniques should be described in the methods section;
  - are tests one-sided or two-sided?
  - are there adjustments for multiple comparisons?
  - exact statistical test results, e.g., P values = x but not P values < x;
  - definition of 'center values' as median or average;
  - definition of error bars as s.d. or s.e.m.

Please complete ALL of the questions below.

Select "Not Applicable" only when the requested information is not relevant for your study.

### Materials

| Category                                                                                                                                                                                                                    | Information included in the manuscript? | In which section is the information available?<br>(Reagents and Tools Table, Materials and Methods, Figures, Data Availability Section)                                                                                                                                                  |
|-----------------------------------------------------------------------------------------------------------------------------------------------------------------------------------------------------------------------------|-----------------------------------------|------------------------------------------------------------------------------------------------------------------------------------------------------------------------------------------------------------------------------------------------------------------------------------------|
| <b>Newly Created Materials</b>                                                                                                                                                                                              |                                         |                                                                                                                                                                                                                                                                                          |
| New materials and reagents need to be available; do any restrictions apply?                                                                                                                                                 | Yes                                     | No restrictions apply                                                                                                                                                                                                                                                                    |
| <b>Antibodies</b>                                                                                                                                                                                                           |                                         |                                                                                                                                                                                                                                                                                          |
| For <b>antibodies</b> provide the following information:<br>- Commercial antibodies: RRID (if possible) or supplier name, catalogue number and or/clone number<br>- Non-commercial: RRID or citation                        | Yes                                     | All information is added in Materials and Methods section                                                                                                                                                                                                                                |
| <b>DNA and RNA sequences</b>                                                                                                                                                                                                |                                         |                                                                                                                                                                                                                                                                                          |
| Short novel DNA or RNA including primers, probes: provide the sequences.                                                                                                                                                    | Yes                                     | All relevant sequences are provided                                                                                                                                                                                                                                                      |
| <b>Cell materials</b>                                                                                                                                                                                                       |                                         |                                                                                                                                                                                                                                                                                          |
| <b>Cell lines:</b> Provide species information, strain. Provide accession number in repository <b>OR</b> supplier name, catalog number, clone number, and <b>OR</b> RRID.                                                   | Yes                                     | HeLa (Kyoto) cells were obtained from D. Gerlich, Institute of Molecular Biotechnology, Wien, Austria. A stable HeLa cell line expressing CHMP4B-eGFP was obtained from Anthony A. Hyman (Max Planck Institute for Molecular Cell Biology and Genetics, Dresden, Germany). The HeLa-VAP- |
| <b>Primary cultures:</b> Provide species, strain, sex of origin, genetic modification status.                                                                                                                               | Not Applicable                          | NA                                                                                                                                                                                                                                                                                       |
| Report if the cell lines were recently <b>authenticated</b> (e.g., by STR profiling) and tested for mycoplasma contamination.                                                                                               | Yes                                     | The cell lines are routinely tested for mycoplasma infections every sixth week by the cell lab-manager.                                                                                                                                                                                  |
| <b>Experimental animals</b>                                                                                                                                                                                                 |                                         |                                                                                                                                                                                                                                                                                          |
| <b>Laboratory animals or Model organisms:</b> Provide species, strain, sex, age, genetic modification status. Provide accession number in repository <b>OR</b> supplier name, catalog number, clone number, <b>OR</b> RRID. | Not Applicable                          | NA                                                                                                                                                                                                                                                                                       |
| <b>Animal observed in or captured from the field:</b> Provide species, sex, and age where possible.                                                                                                                         | Not Applicable                          | NA                                                                                                                                                                                                                                                                                       |
| Please detail <b>housing and husbandry conditions</b> .                                                                                                                                                                     | Not Applicable                          | NA                                                                                                                                                                                                                                                                                       |
| <b>Plants and microbes</b>                                                                                                                                                                                                  |                                         |                                                                                                                                                                                                                                                                                          |
| <b>Plants:</b> provide species and strain, ecotype and cultivar where relevant, unique accession number if available, and source (including location for collected wild specimens).                                         | Not Applicable                          | NA                                                                                                                                                                                                                                                                                       |
| <b>Microbes:</b> provide species and strain, unique accession number if available, and source.                                                                                                                              | Not Applicable                          | NA                                                                                                                                                                                                                                                                                       |
| <b>Human research participants</b>                                                                                                                                                                                          |                                         |                                                                                                                                                                                                                                                                                          |
| If collected and within the bounds of privacy constraints report on age, sex and gender or ethnicity for all study participants.                                                                                            | Not Applicable                          | NA                                                                                                                                                                                                                                                                                       |
| <b>Core facilities</b>                                                                                                                                                                                                      |                                         |                                                                                                                                                                                                                                                                                          |
| If your work benefited from core facilities, was their service mentioned in the acknowledgments section?                                                                                                                    | Yes                                     | Acknowledgements section                                                                                                                                                                                                                                                                 |

### Design

| <b>Study protocol</b>                                                                                                                                     | <b>Information included in the manuscript?</b> | <b>In which section is the information available?</b><br>(Reagents and Tools Table, Materials and Methods, Figures, Data Availability Section) |
|-----------------------------------------------------------------------------------------------------------------------------------------------------------|------------------------------------------------|------------------------------------------------------------------------------------------------------------------------------------------------|
| If study protocol has been <b>pre-registered</b> , provide DOI in the manuscript. For clinical trials, provide the trial registration number OR cite DOI. | Not Applicable                                 | NA                                                                                                                                             |
| Report the <b>clinical trial registration number</b> (at ClinicalTrials.gov or equivalent), where applicable.                                             | Not Applicable                                 | NA                                                                                                                                             |

| <b>Laboratory protocol</b>                                                                              | <b>Information included in the manuscript?</b> | <b>In which section is the information available?</b><br>(Reagents and Tools Table, Materials and Methods, Figures, Data Availability Section) |
|---------------------------------------------------------------------------------------------------------|------------------------------------------------|------------------------------------------------------------------------------------------------------------------------------------------------|
| Provide DOI OR other citation details if <b>external detailed step-by-step protocols</b> are available. | Not Applicable                                 | NA                                                                                                                                             |

| <b>Experimental study design and statistics</b>                                                                                                                                                                                                                                                                                            | <b>Information included in the manuscript?</b> | <b>In which section is the information available?</b><br>(Reagents and Tools Table, Materials and Methods, Figures, Data Availability Section) |
|--------------------------------------------------------------------------------------------------------------------------------------------------------------------------------------------------------------------------------------------------------------------------------------------------------------------------------------------|------------------------------------------------|------------------------------------------------------------------------------------------------------------------------------------------------|
| Include a statement about <b>sample size</b> estimate even if no statistical methods were used.                                                                                                                                                                                                                                            | Not Applicable                                 | NA                                                                                                                                             |
| Were any steps taken to minimize the effects of subjective bias when allocating animals/samples to treatment (e.g. <b>randomization procedure</b> )? If yes, have they been described?                                                                                                                                                     | Not Applicable                                 | NA                                                                                                                                             |
| Include a statement about <b>blinding</b> even if no blinding was done.                                                                                                                                                                                                                                                                    | Not Applicable                                 | NA                                                                                                                                             |
| Describe <b>inclusion/exclusion criteria</b> if samples or animals were excluded from the analysis. Were the criteria pre-established?                                                                                                                                                                                                     | Not Applicable                                 | NA                                                                                                                                             |
| If sample or data points were omitted from analysis, report if this was due to <b>attrition or intentional exclusion</b> and provide justification.                                                                                                                                                                                        | Not Applicable                                 | NA                                                                                                                                             |
| For every figure, are <b>statistical tests</b> justified as appropriate? Do the data meet the assumptions of the tests (e.g., normal distribution)? Describe any methods used to assess it. Is there an estimate of variation within each group of data? Is the variance similar between the groups that are being statistically compared? | Yes                                            | All statistical test are described in figure legends                                                                                           |

| <b>Sample definition and in-laboratory replication</b>                                           | <b>Information included in the manuscript?</b> | <b>In which section is the information available?</b><br>(Reagents and Tools Table, Materials and Methods, Figures, Data Availability Section) |
|--------------------------------------------------------------------------------------------------|------------------------------------------------|------------------------------------------------------------------------------------------------------------------------------------------------|
| In the figure legends: state number of times the experiment was <b>replicated</b> in laboratory. | Yes                                            | All figures legends contain a clear statement how many times experiments were carried out.                                                     |
| In the figure legends: define whether data describe <b>technical or biological replicates</b> .  | Yes                                            | All replicates mentioned throughout the manuscript are biological replicates.                                                                  |

#### Ethics

| <b>Ethics</b>                                                                                                                                                                                                                                                                                            | <b>Information included in the manuscript?</b> | <b>In which section is the information available?</b><br>(Reagents and Tools Table, Materials and Methods, Figures, Data Availability Section) |
|----------------------------------------------------------------------------------------------------------------------------------------------------------------------------------------------------------------------------------------------------------------------------------------------------------|------------------------------------------------|------------------------------------------------------------------------------------------------------------------------------------------------|
| Studies involving <b>human participants</b> : State details of <b>authority granting ethics approval</b> (IRB or equivalent committee(s), provide reference number for approval).                                                                                                                        | Not Applicable                                 | NA                                                                                                                                             |
| Studies involving <b>human participants</b> : Include a statement confirming that <b>informed consent</b> was obtained from all subjects and that the experiments conformed to the principles set out in the WMA Declaration of Helsinki and the Department of Health and Human Services Belmont Report. | Not Applicable                                 | NA                                                                                                                                             |
| Studies involving <b>human participants</b> : For publication of <b>patient photos</b> , include a statement confirming that consent to publish was obtained.                                                                                                                                            | Not Applicable                                 | NA                                                                                                                                             |
| Studies involving experimental <b>animals</b> : State details of <b>authority granting ethics approval</b> (IRB or equivalent committee(s), provide reference number for approval. Include a statement of compliance with ethical regulations.                                                           | Not Applicable                                 | NA                                                                                                                                             |
| Studies involving <b>specimen and field samples</b> : State if relevant <b>permits</b> obtained, provide details of authority approving study; if none were required, explain why.                                                                                                                       | Not Applicable                                 | NA                                                                                                                                             |

| <b>Dual Use Research of Concern (DURC)</b>                                                                                                                                                                                                            | <b>Information included in the manuscript?</b> | <b>In which section is the information available?</b><br>(Reagents and Tools Table, Materials and Methods, Figures, Data Availability Section) |
|-------------------------------------------------------------------------------------------------------------------------------------------------------------------------------------------------------------------------------------------------------|------------------------------------------------|------------------------------------------------------------------------------------------------------------------------------------------------|
| Could your study fall under dual use research restrictions? Please check biosecurity documents and list of <b>select agents and toxins</b> (CDC): <a href="https://www.selectagents.gov/sat/list.htm">https://www.selectagents.gov/sat/list.htm</a> . | Not Applicable                                 | No                                                                                                                                             |
| If you used a select agent, is the security level of the lab appropriate and reported in the manuscript?                                                                                                                                              | Not Applicable                                 | Most reagents used in this manuscript are security level1, except where we used lentiviruses which are biosecurity level 2.                    |
| If a study is subject to dual use research of concern regulations, is the name of the <b>authority granting approval and reference number</b> for the regulatory approval provided in the manuscript?                                                 | Not Applicable                                 | NA                                                                                                                                             |

#### Reporting

The MDAR framework recommends adoption of discipline-specific guidelines, established and endorsed through community initiatives. Journals have their own policy about requiring specific guidelines and recommendations to complement MDAR.

| <b>Adherence to community standards</b>                                                                                                                                                                                                                                                                                              | <b>Information included in the manuscript?</b> | <b>In which section is the information available?</b><br>(Reagents and Tools Table, Materials and Methods, Figures, Data Availability Section) |
|--------------------------------------------------------------------------------------------------------------------------------------------------------------------------------------------------------------------------------------------------------------------------------------------------------------------------------------|------------------------------------------------|------------------------------------------------------------------------------------------------------------------------------------------------|
| State if relevant guidelines or checklists (e.g., <b>ICMJE, MIBBI, ARRIVE, PRISMA</b> ) have been followed or provided.                                                                                                                                                                                                              | Not Applicable                                 | NA                                                                                                                                             |
| For <b>tumor marker prognostic studies</b> , we recommend that you follow the <b>REMARK</b> reporting guidelines (see link list at top right). See author guidelines, under 'Reporting Guidelines'. Please confirm you have followed these guidelines.                                                                               | Not Applicable                                 | NA                                                                                                                                             |
| For <b>phase II and III randomized controlled trials</b> , please refer to the <b>CONSORT</b> flow diagram (see link list at top right) and submit the <b>CONSORT</b> checklist (see link list at top right) with your submission. See author guidelines, under 'Reporting Guidelines'. Please confirm you have submitted this list. | Not Applicable                                 | NA                                                                                                                                             |

#### Data Availability

| <b>Data availability</b>                                                                                                                                                                          | <b>Information included in the manuscript?</b> | <b>In which section is the information available?</b><br>(Reagents and Tools Table, Materials and Methods, Figures, Data Availability Section) |
|---------------------------------------------------------------------------------------------------------------------------------------------------------------------------------------------------|------------------------------------------------|------------------------------------------------------------------------------------------------------------------------------------------------|
| Have <b>primary datasets</b> been deposited according to the journal's guidelines (see 'Data Deposition' section) and the respective accession numbers provided in the Data Availability Section? | Not Applicable                                 | NA                                                                                                                                             |
| Were <b>human clinical and genomic datasets</b> deposited in a public access-controlled repository in accordance to ethical obligations to the patients and to the applicable consent agreement?  | Not Applicable                                 | NA                                                                                                                                             |
| Are <b>computational models</b> that are central and integral to a study available without restrictions in a machine-readable form? Were the relevant accession numbers or links provided?        | Not Applicable                                 | NA                                                                                                                                             |
| If publicly available data were reused, provide the respective <b>data citations</b> in the reference list.                                                                                       | Not Applicable                                 | NA                                                                                                                                             |
